# Supplementary material for: Multi-component anion relay cascade of 1-acetylcyclopropanecarboxamides, aldehydes and acrylonitrile: access to biscyanoethylated furo[3,2-c]pyridinones
Source: Royal Society of Chemistry journal article supplement (doi:10.1039/c2ob25550b), 2012-01-01

Supplementary Material (ESI) for Organic & Biomolecular Chemistry  
This journal is (c) The Royal Society of Chemistry 2012

**Multi-component anion relay cascade of  
1-acetylcyclopropanecarboxamides, aldehydes and acrylonitrile:  
access to biscyanoethylated furo[3,2-c]pyridinones**

**Shao Shaoxia Lin,<sup>a</sup> Ying Wei,<sup>a</sup> Fushun Liang,<sup>a,\*</sup> Baozhong Zhao,<sup>a</sup> Yanling Liu <sup>b</sup> and  
Pengjun Liu<sup>b,\*</sup>**

<sup>a</sup> Department of Chemistry, Northeast Normal University, Changchun 130024, China.

Email: liangfs112@nenu.edu.cn.

Fax: (+86) 431-85099759

<sup>b</sup> College of Chemistry and Chemical Engineering, Hainan Normal University, Haikou  
571158, China. Email: liupj12@126.com.

**Supplementary information**





Supplementary Material (ESI) for Organic & Biomolecular Chemistry  
This journal is (c) The Royal Society of Chemistry 2012

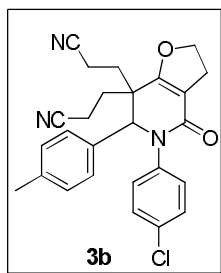

STANDARD PROTON PARAMETERS  
Archive directory: /export/home/ouy/vmrsys/data  
Sample directory:  
Pulse Sequence: s2pu1  
Solvent: CDCl3  
Pulse program: zgpg30  
F1: 500.136 MHz  
INVOA-500 "NENUS00"  
Relax. delay 1.000 sec  
Pulse 45.0 degrees  
Acq. time 0.000 sec  
Width 7896.8 Hz  
32 repetitions  
OBSERVE H1 499.8025907 MHz  
P1 12.000000 sec  
P2 12.000000 sec  
P3 12.000000 sec  
Total time 1 min, 32 sec

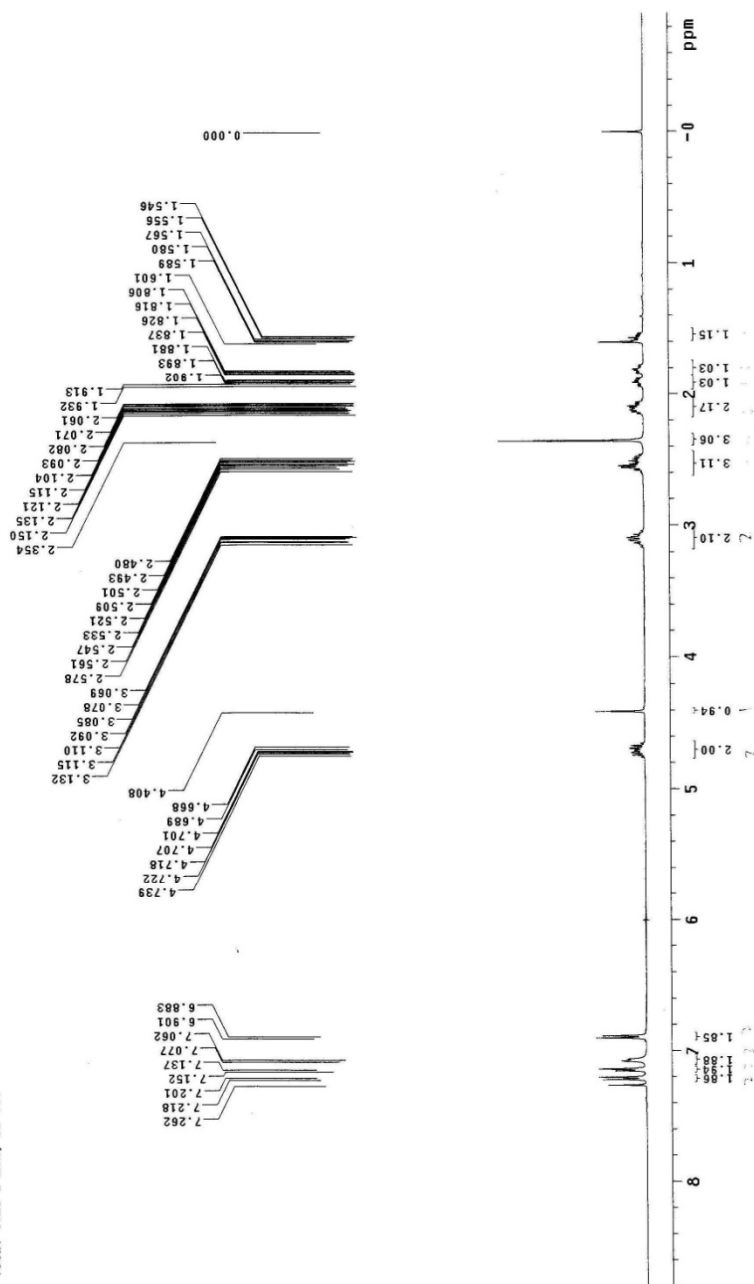

Supplementary Material (ESI) for Organic & Biomolecular Chemistry  
This journal is (c) The Royal Society of Chemistry 2012

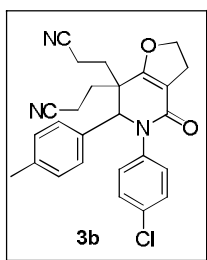

STANDARD CARBON PARAMETERS  
Archive directory: /export/home/ouy/vnmr/sys/data  
Sample directory:  
Pulse Sequence: s2pul  
Solvent: cdcl3  
Ambient temperature  
User: j14-87  
NO: 005-0001  
INOVA-500 "NMR500"  
Relax. delay 0.500 sec  
Pulse 45.0 degrees  
Acq. time 1.56 sec  
Waltz 302.8 Hz  
576 repetitions  
OBSERVE C13, 125.6754632 MHz  
DECOUPLE H1, 499.8050905 MHz  
Polarization  
continuous IV  
WALTZ-16 modulated  
DATA PROCESSING  
Larmor frequency 1.5 Hz  
FT size 131072  
Total time 3 hr, 56 sec

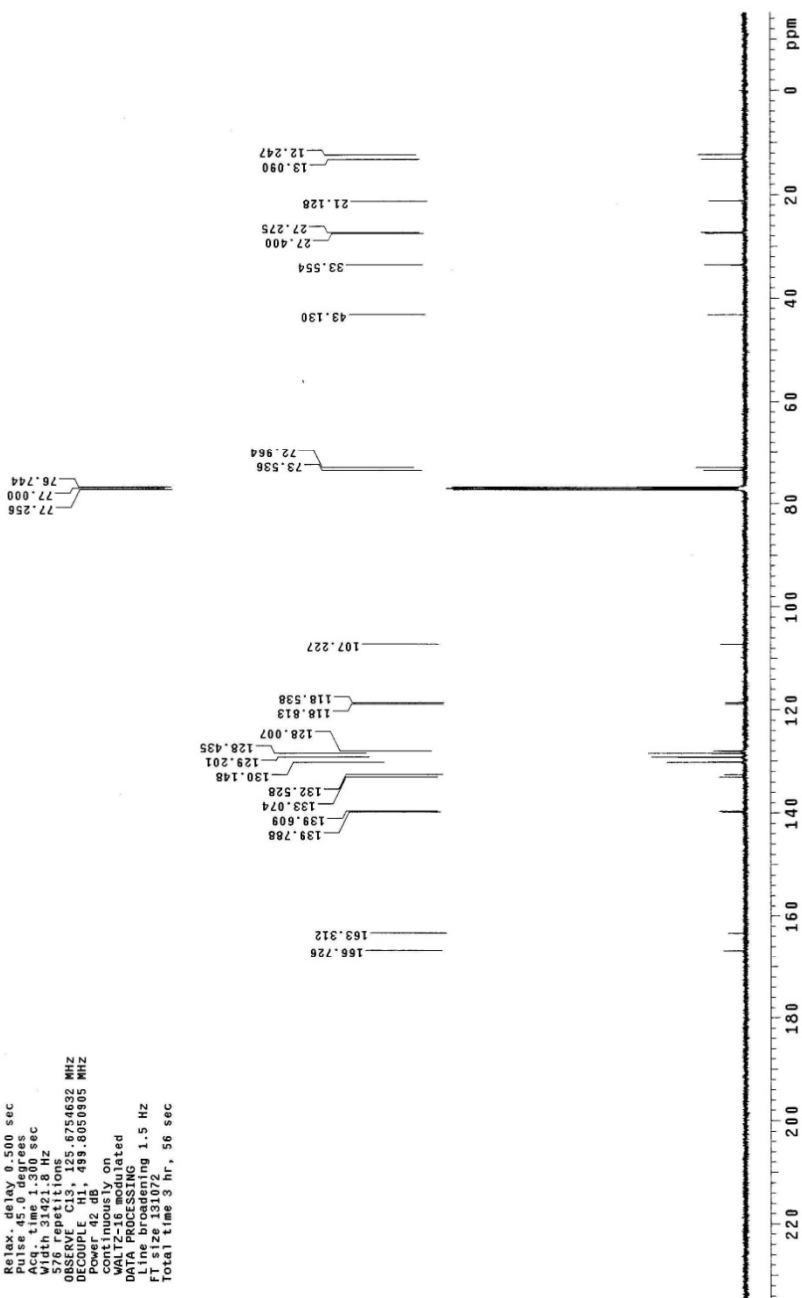



Supplementary Material (ESI) for Organic & Biomolecular Chemistry  
This journal is (c) The Royal Society of Chemistry 2012

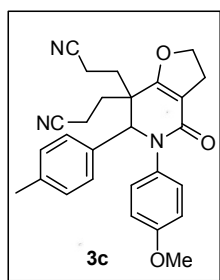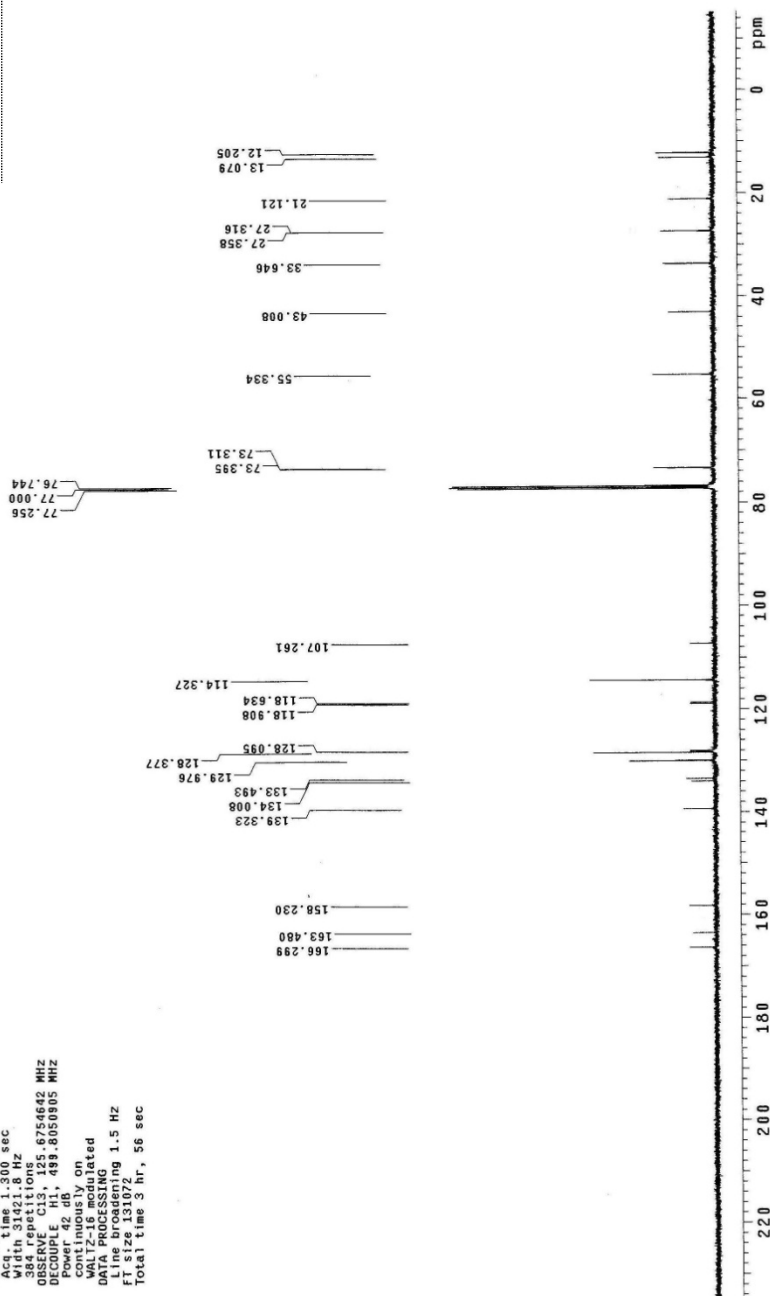

STANDARD CARBON PARAMETERS  
Archive directory: /export/home/ouxy/vnmrsys/data  
Sample directory:

Pulse Sequence: s2pul  
Solvent: cdcl3  
Name: 3c  
User: l-1487  
File: c0648  
INVOA-500 "NENUS00"  
Relax. delay 0.500 sec  
Acq. time 1.300 sec  
Width 31421.8 Hz  
384 repetitions  
OBSERVE CH1, 481.8050805 MHz  
DECOUPLE H1, 481.8050805 MHz  
Power 42 dB  
continuously on  
WALTZ16 modulated  
DATA PROCESSING  
Line broadening 1.5 Hz  
FT size 131072  
Total time 3 hr, 56 sec

Supplementary Material (ESI) for Organic & Biomolecular Chemistry  
This journal is (c) The Royal Society of Chemistry 2012

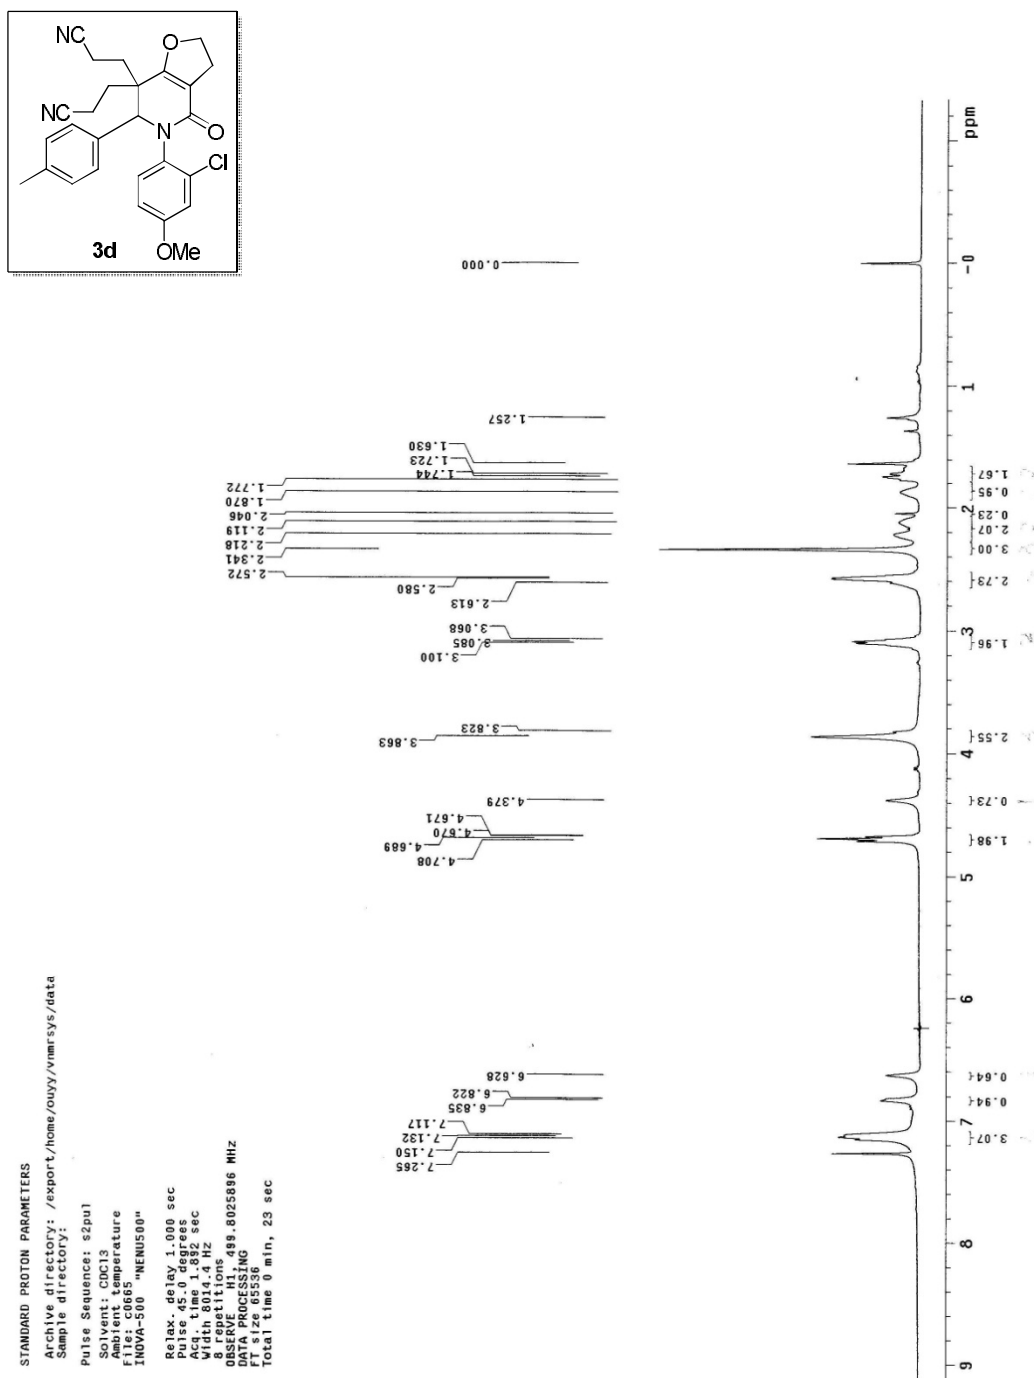



Supplementary Material (ESI) for Organic & Biomolecular Chemistry  
This journal is (c) The Royal Society of Chemistry 2012

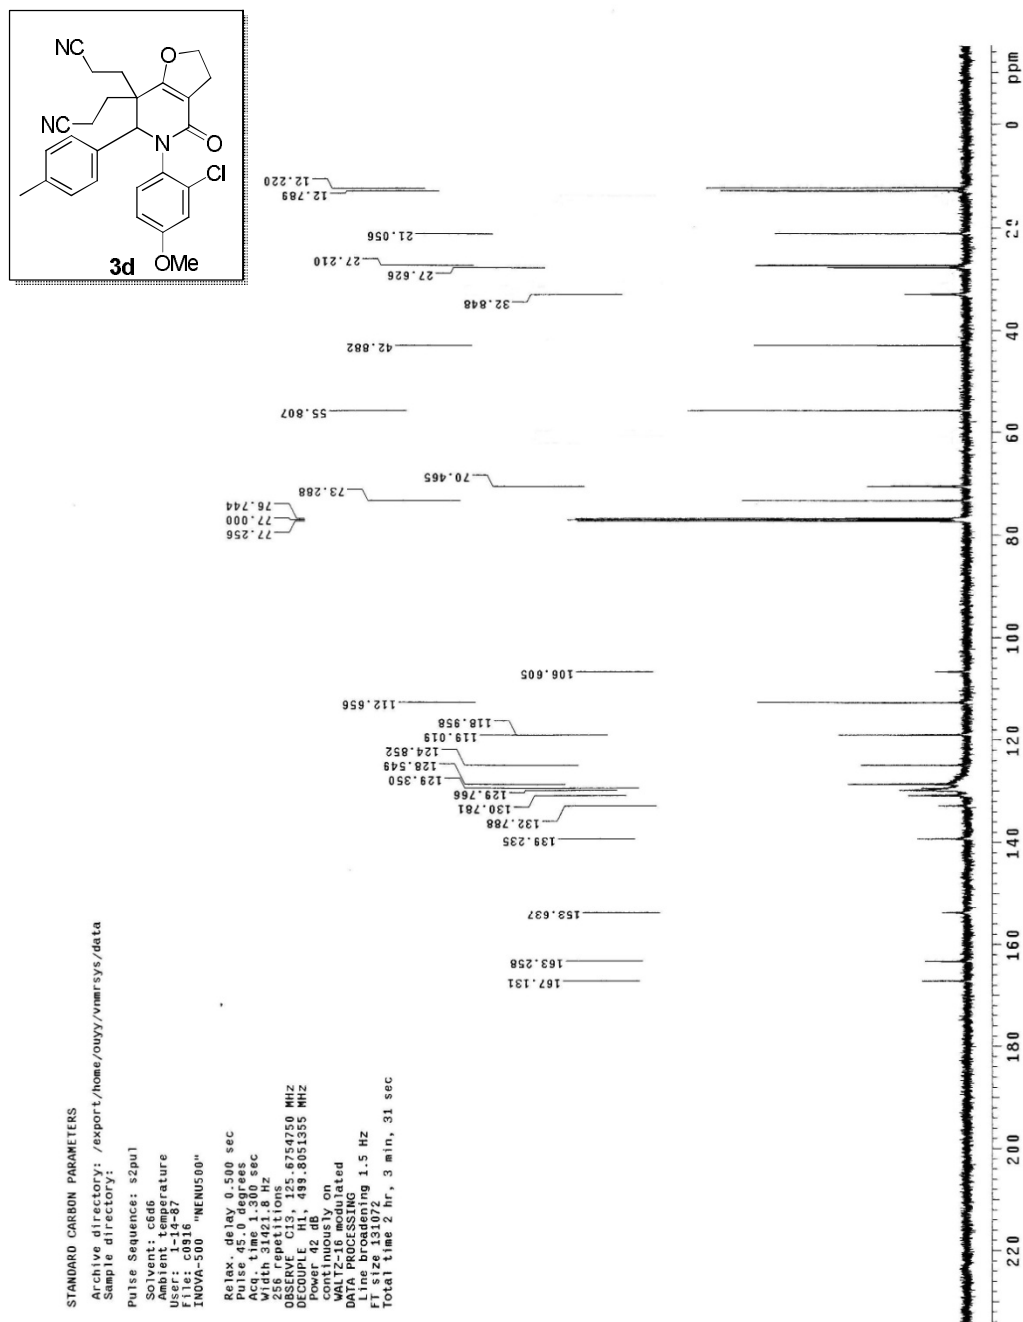





Supplementary Material (ESI) for Organic & Biomolecular Chemistry  
This journal is (c) The Royal Society of Chemistry 2012

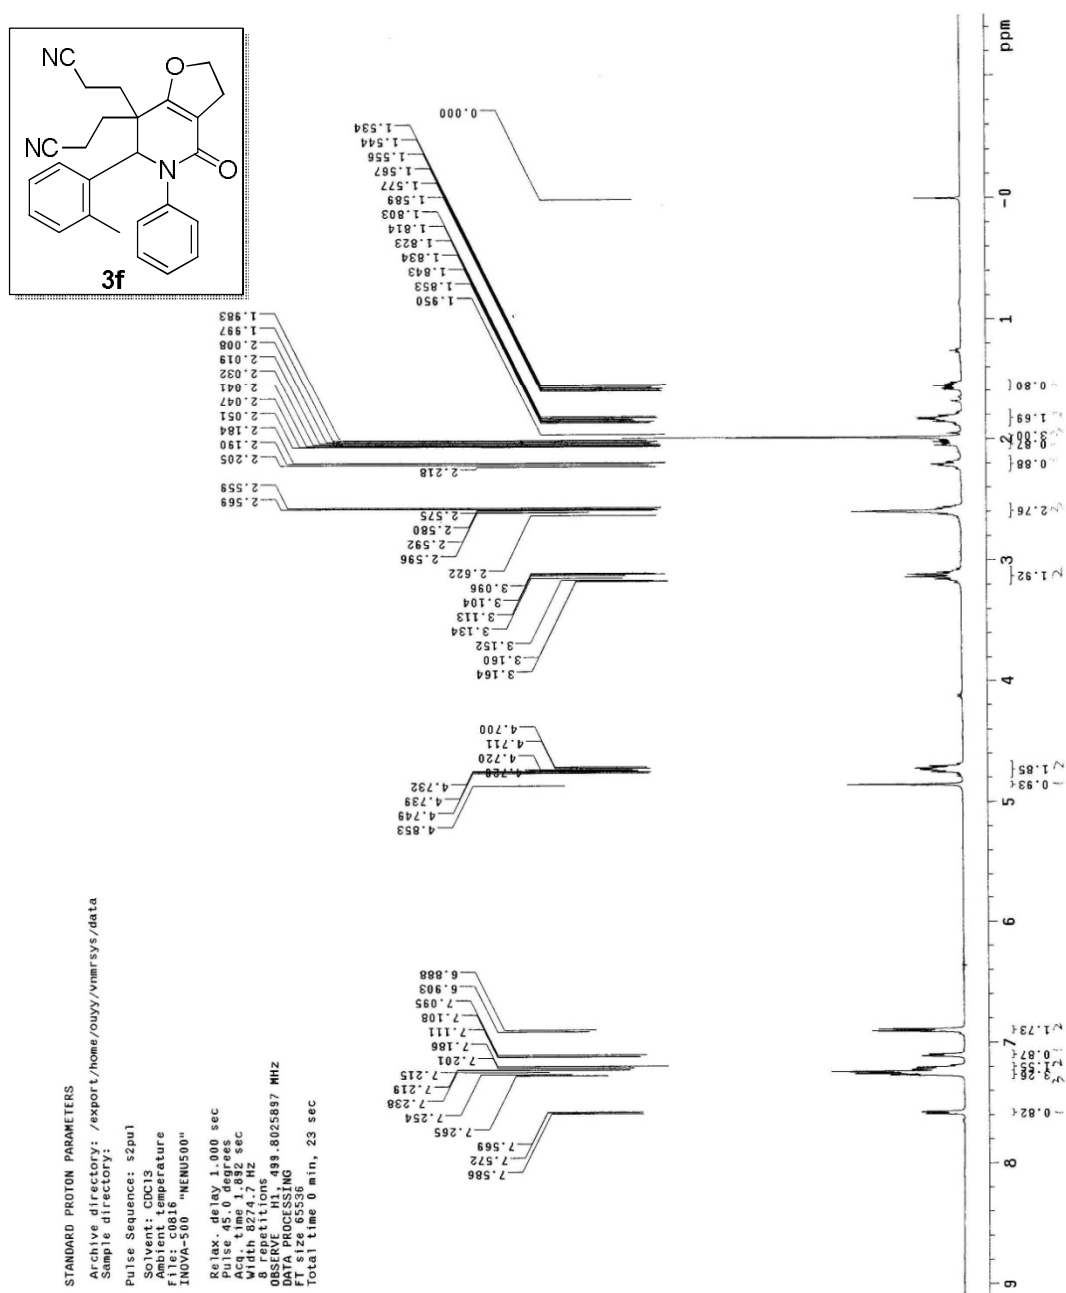

Supplementary Material (ESI) for Organic & Biomolecular Chemistry  
This journal is (c) The Royal Society of Chemistry 2012

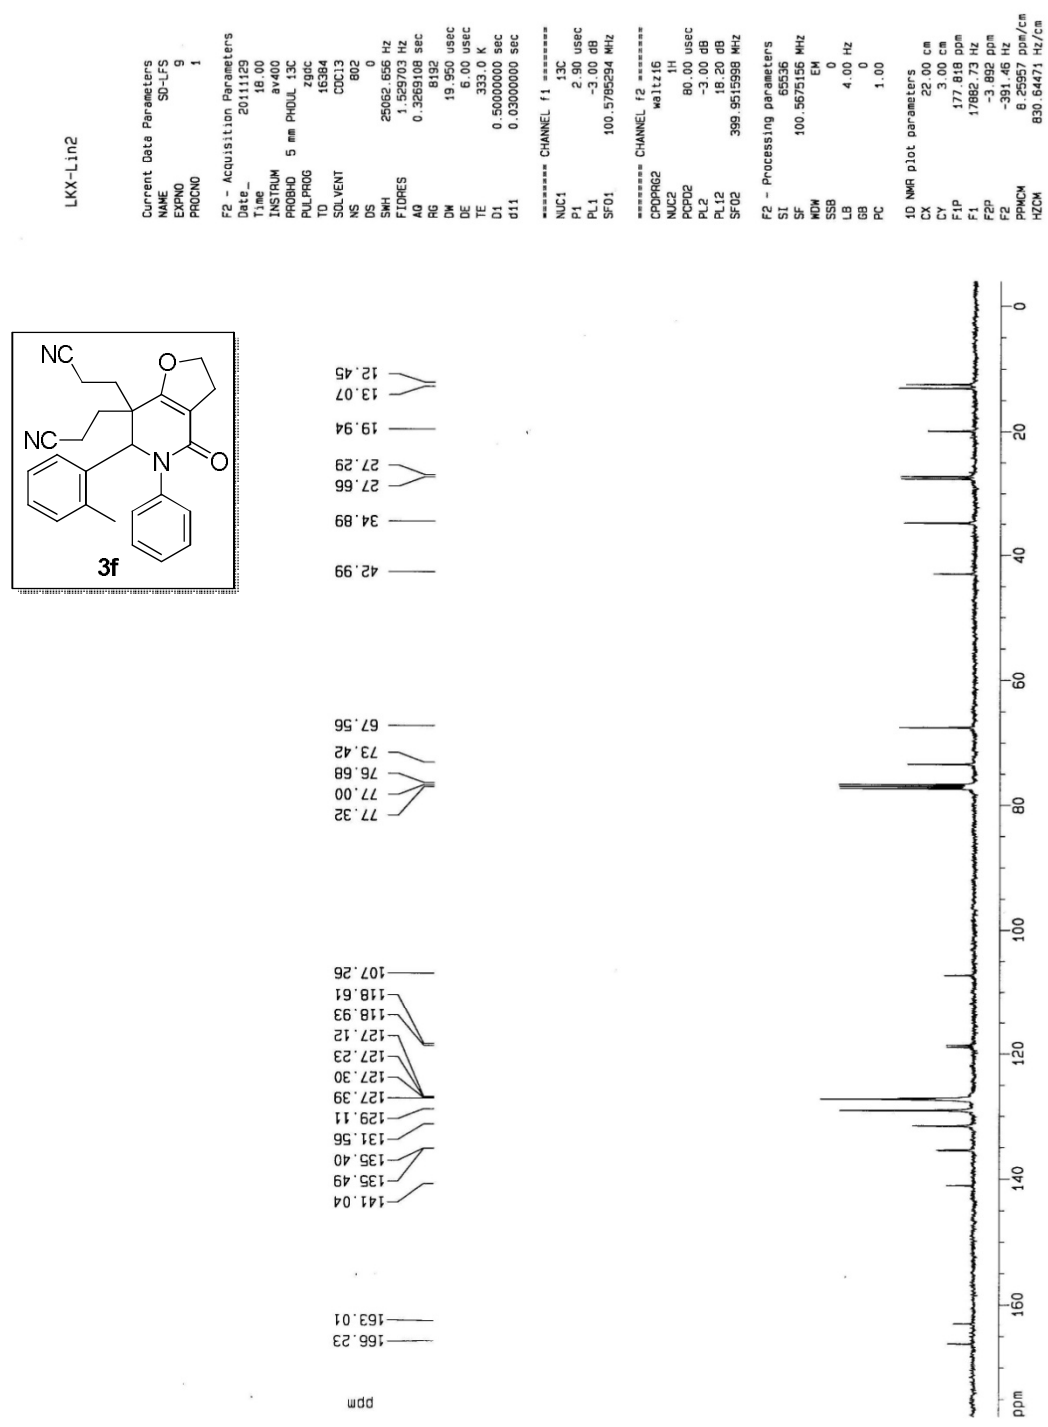

Supplementary Material (ESI) for Organic & Biomolecular Chemistry  
This journal is (c) The Royal Society of Chemistry 2012

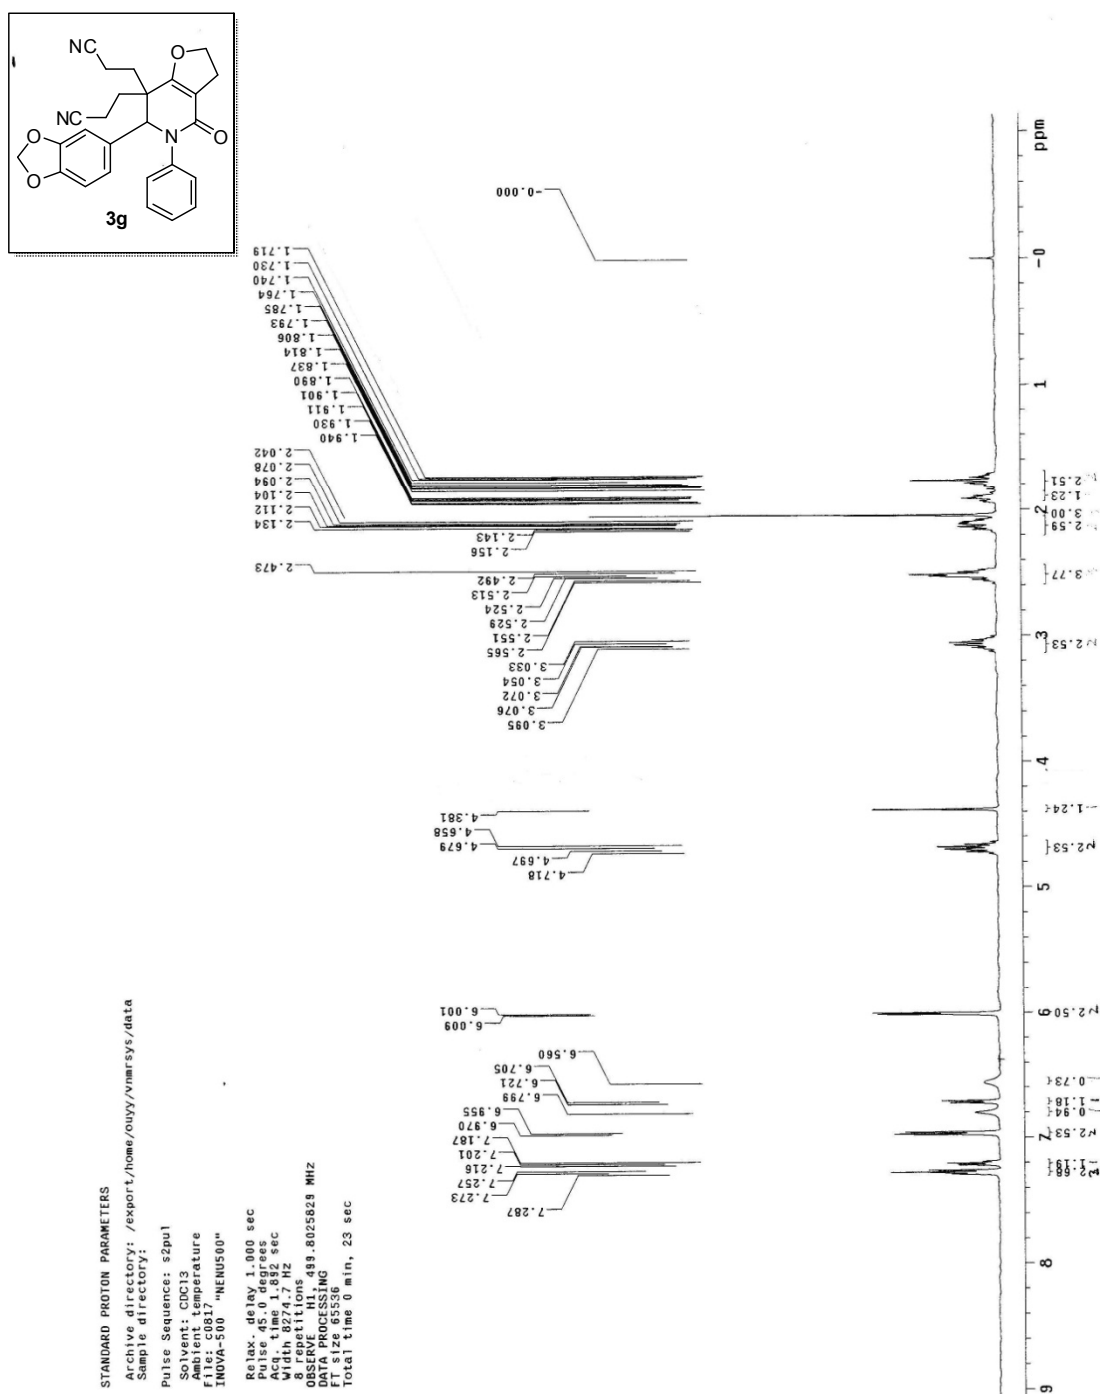

Supplementary Material (ESI) for Organic & Biomolecular Chemistry  
This journal is (c) The Royal Society of Chemistry 2012

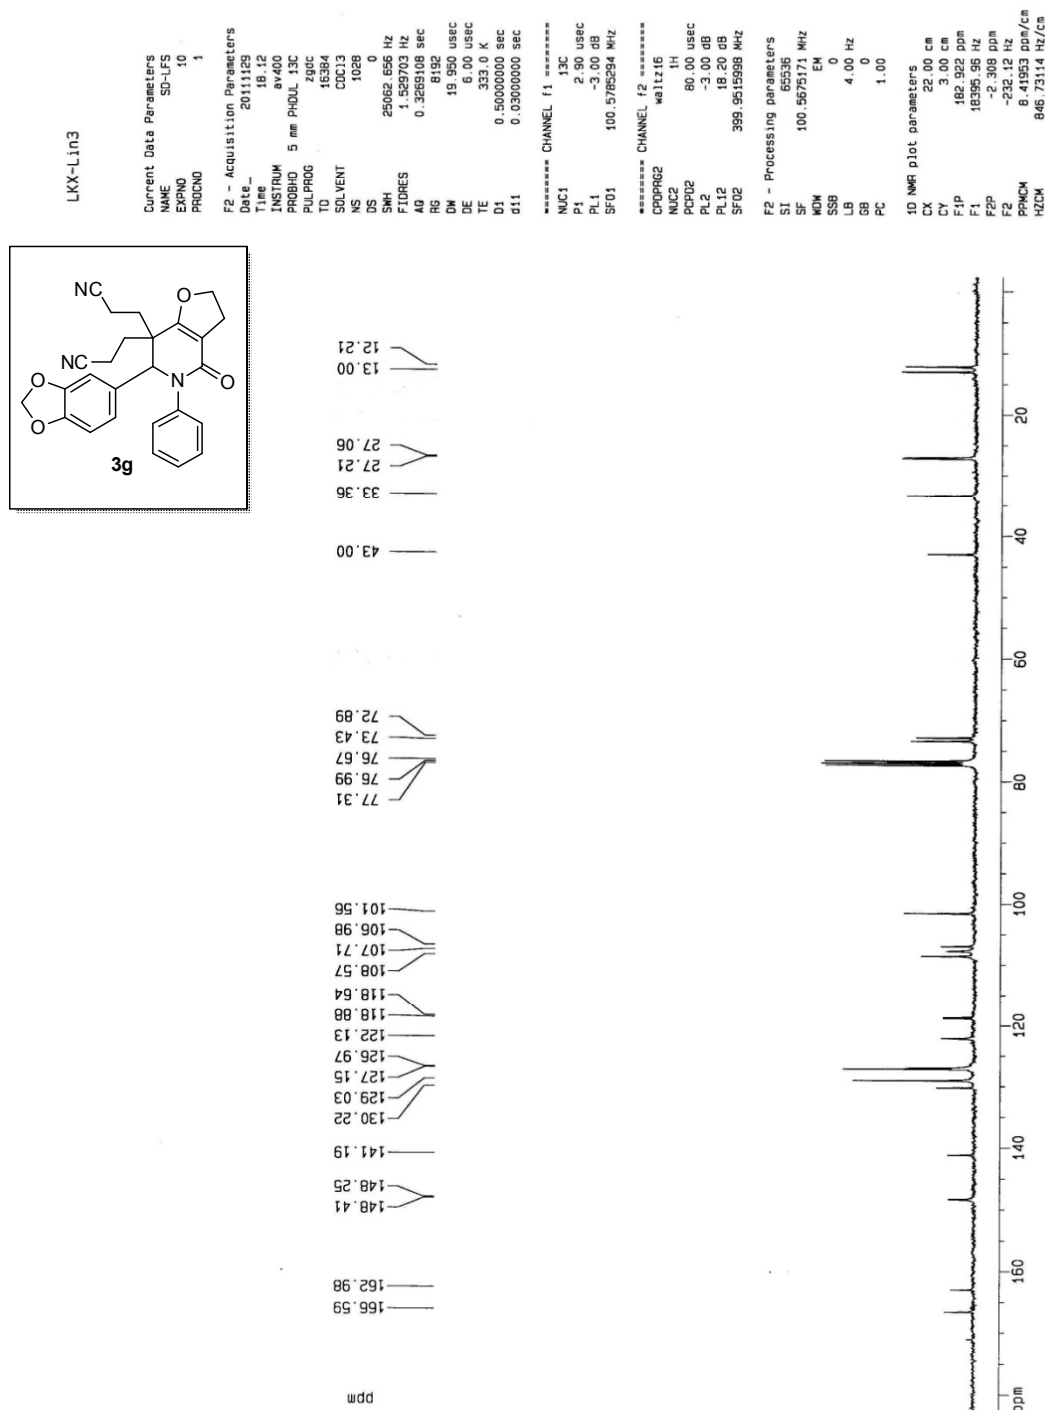

Supplementary Material (ESI) for Organic & Biomolecular Chemistry  
This journal is (c) The Royal Society of Chemistry 2012

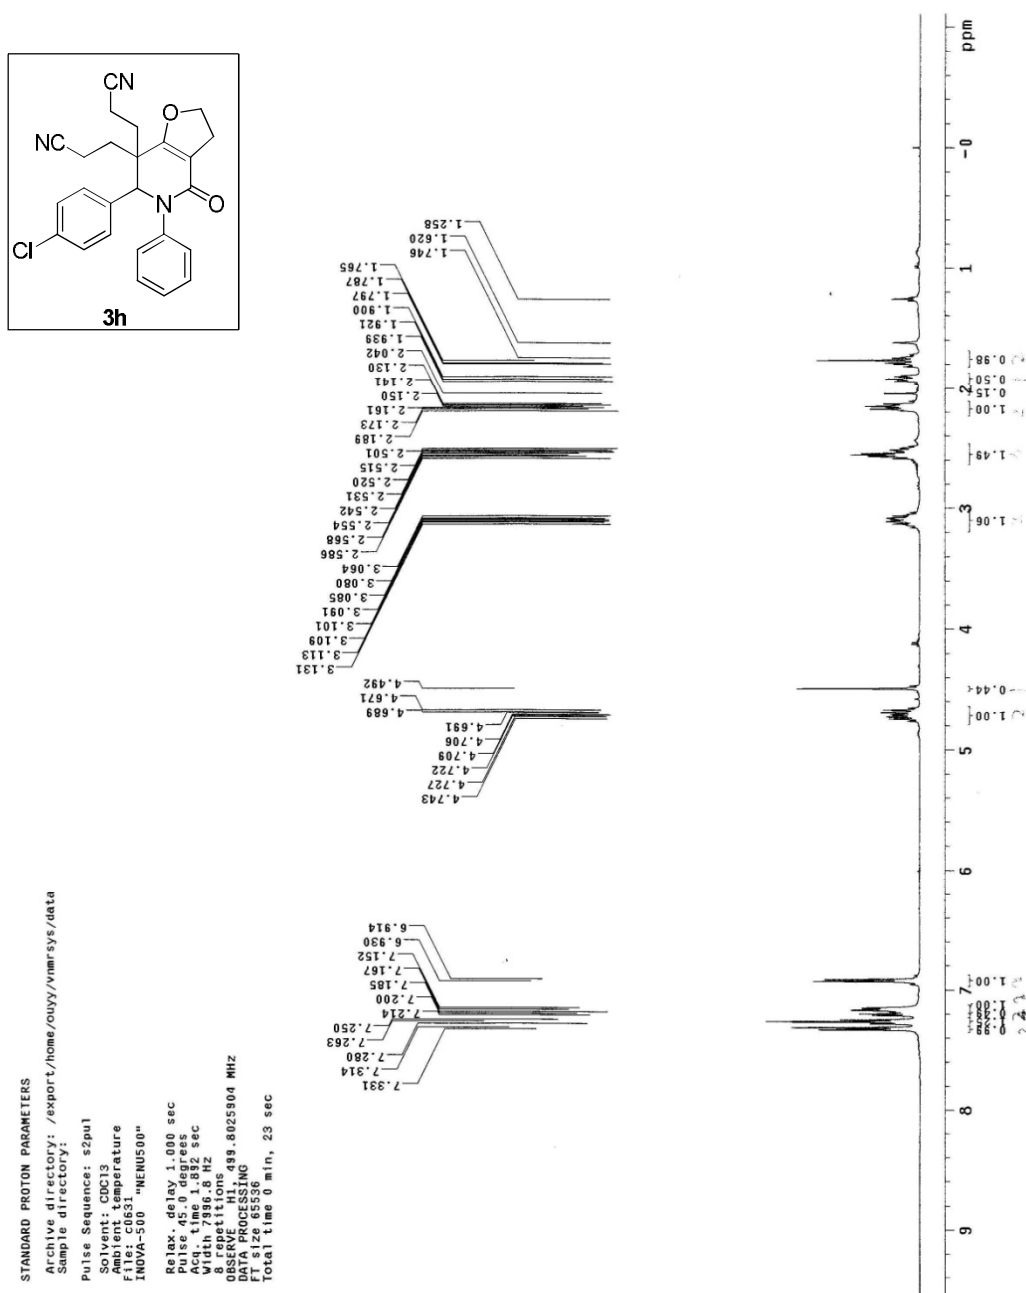



Supplementary Material (ESI) for Organic & Biomolecular Chemistry  
This journal is (c) The Royal Society of Chemistry 2012

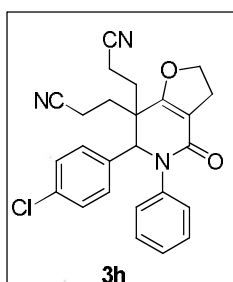

STANDARD CARBON PARAMETERS  
Archive directory: /export/home/ouxy/vnmrsys/data  
Sample directory:  
Pulse Sequence: s2pul  
Solvent: cdcl3  
Ambient temperature  
P1: 1.50  
P2: 1.50  
File: c0632  
INOVA-500 "MNU500"  
Relax. delay 0.500 sec  
Pulse 45.0 degrees  
Acq. time 1.500 sec  
Width 31421.8 Hz  
128 repetitions  
OBSERVE C13, 125.6754335 MHz  
DECOUPLE H1, 499.5050905 MHz  
P2: 0.08, continuously on  
WALTZ-16 modulated  
DATA PROCESSING  
F2 size 131072  
Time 2 hr, 3 min, 31 sec  
Total time 2 hr, 3 min, 31 sec

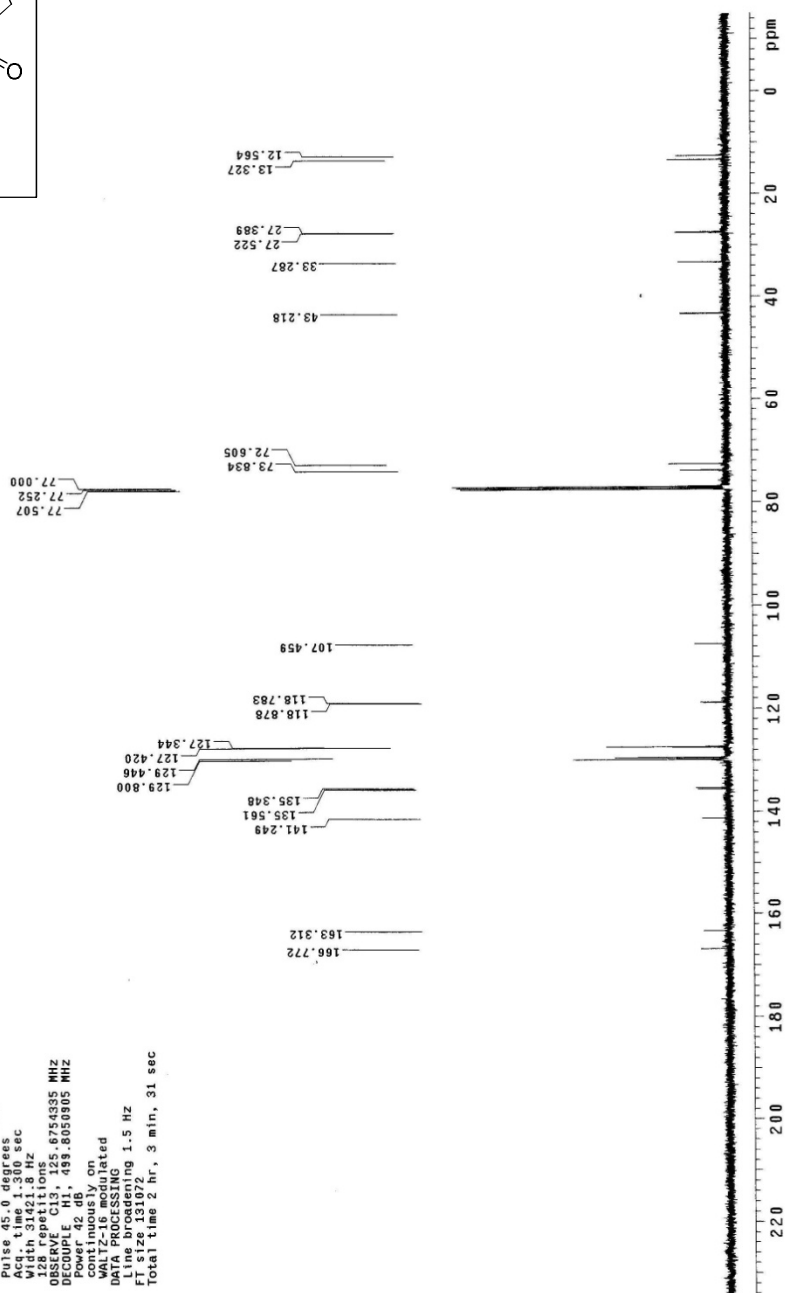



Supplementary Material (ESI) for Organic & Biomolecular Chemistry  
This journal is (c) The Royal Society of Chemistry 2012

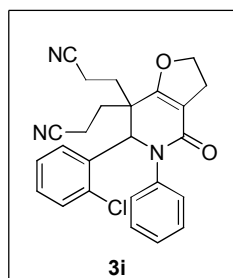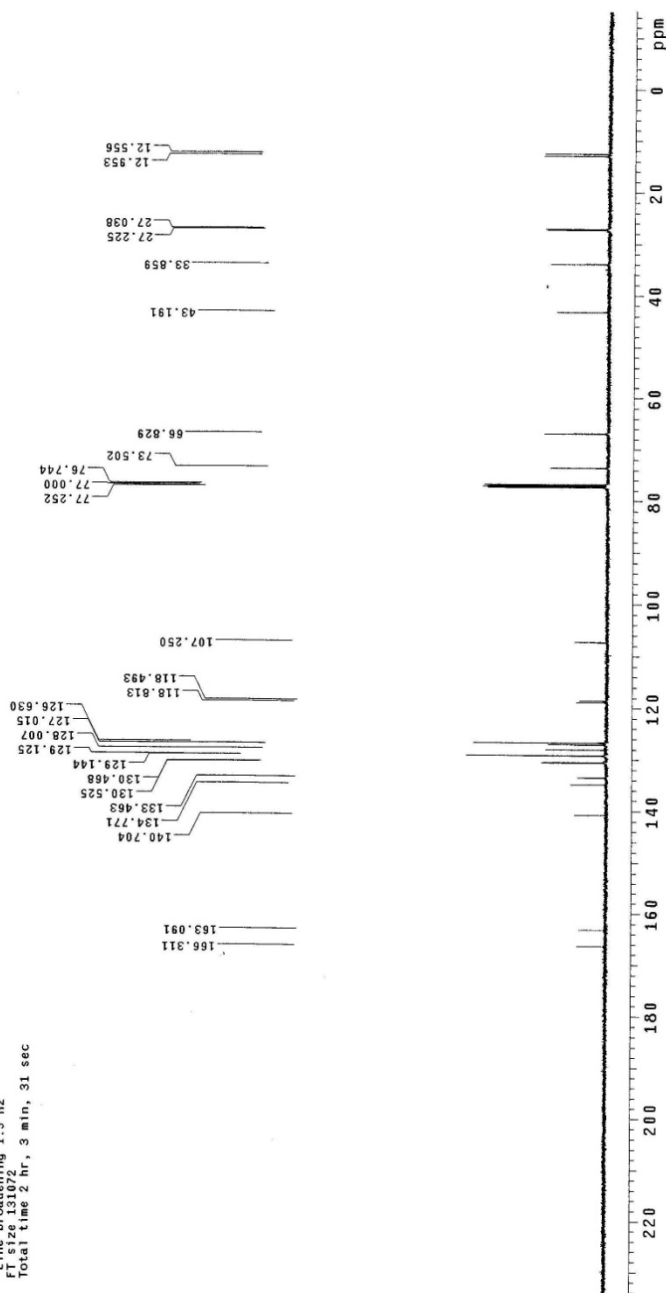

STANDARD CARBON PARAMETERS  
Archive directory: /export/home/ouy/vnmrsys/data  
Sample directory:  
Pulse Sequence: s2pul  
Solvent: cdd6  
Sample temperature: 110.000  
File: c0833  
INDRA-500 "NENU500"  
Relax. delay 0.500 sec  
Pulse delay 0.000 sec  
Acq time 1.300 sec  
Width 31421.8 Hz  
128 Repetitions  
OBSERVE CH1, 125.6754721 MHz  
DECOUPLE CH1, 439.801355 MHz  
Power 42 dB  
Continuously on  
Waltz16 modulated  
Waltz16 modulated  
Waltz16 modulated  
Line broadening 1.5 Hz  
FT size 131072  
Total time 2 hr, 3 min, 31 sec

Supplementary Material (ESI) for Organic & Biomolecular Chemistry  
This journal is (c) The Royal Society of Chemistry 2012

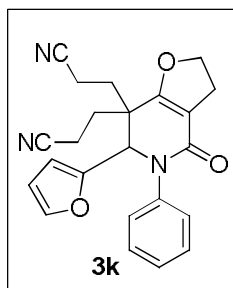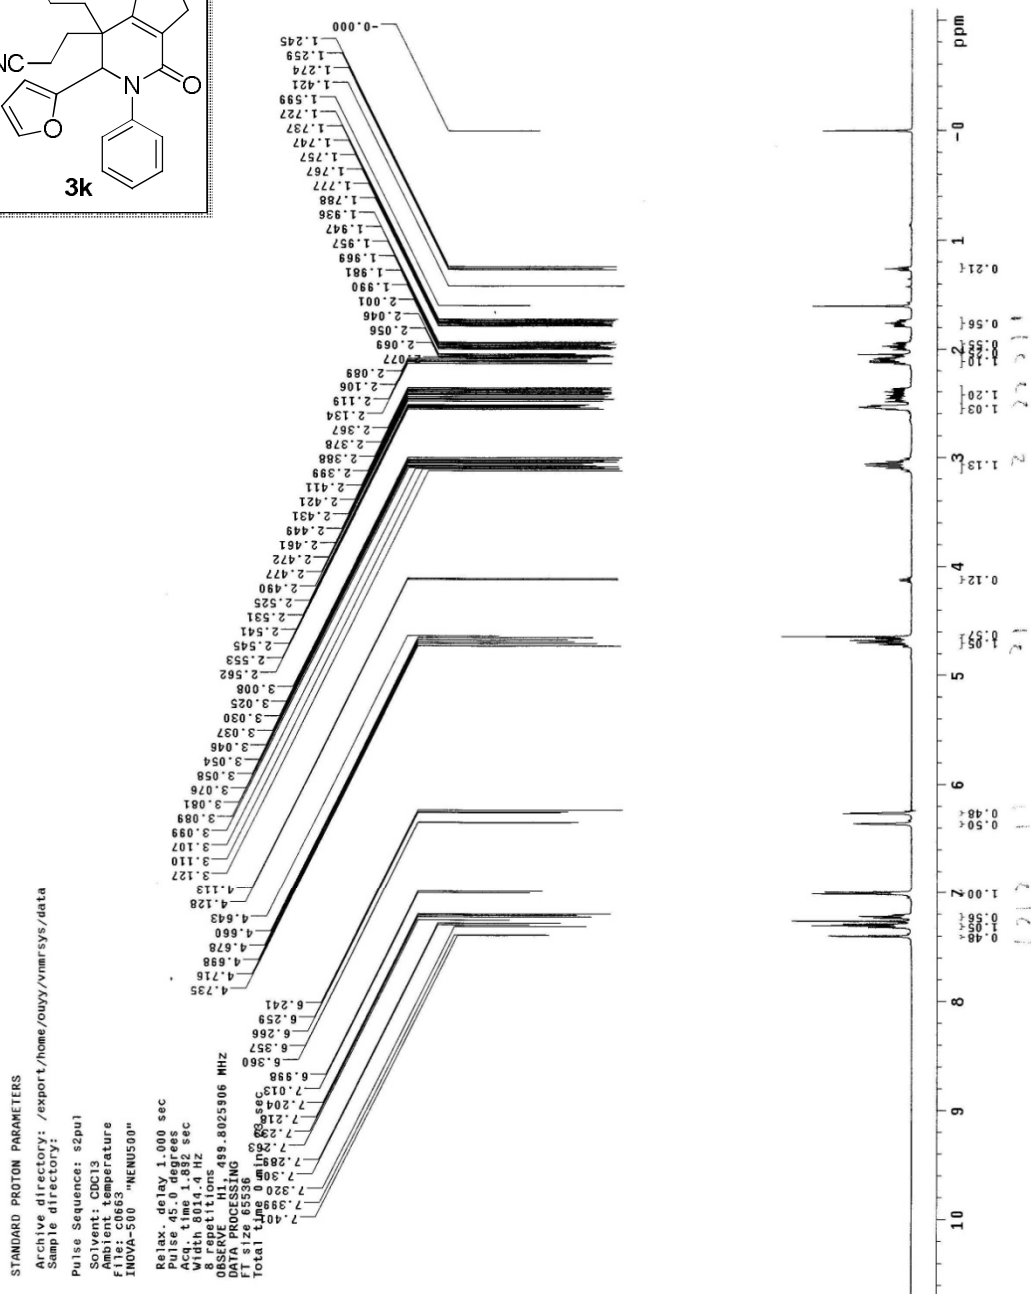

Supplementary Material (ESI) for Organic & Biomolecular Chemistry  
This journal is (c) The Royal Society of Chemistry 2012

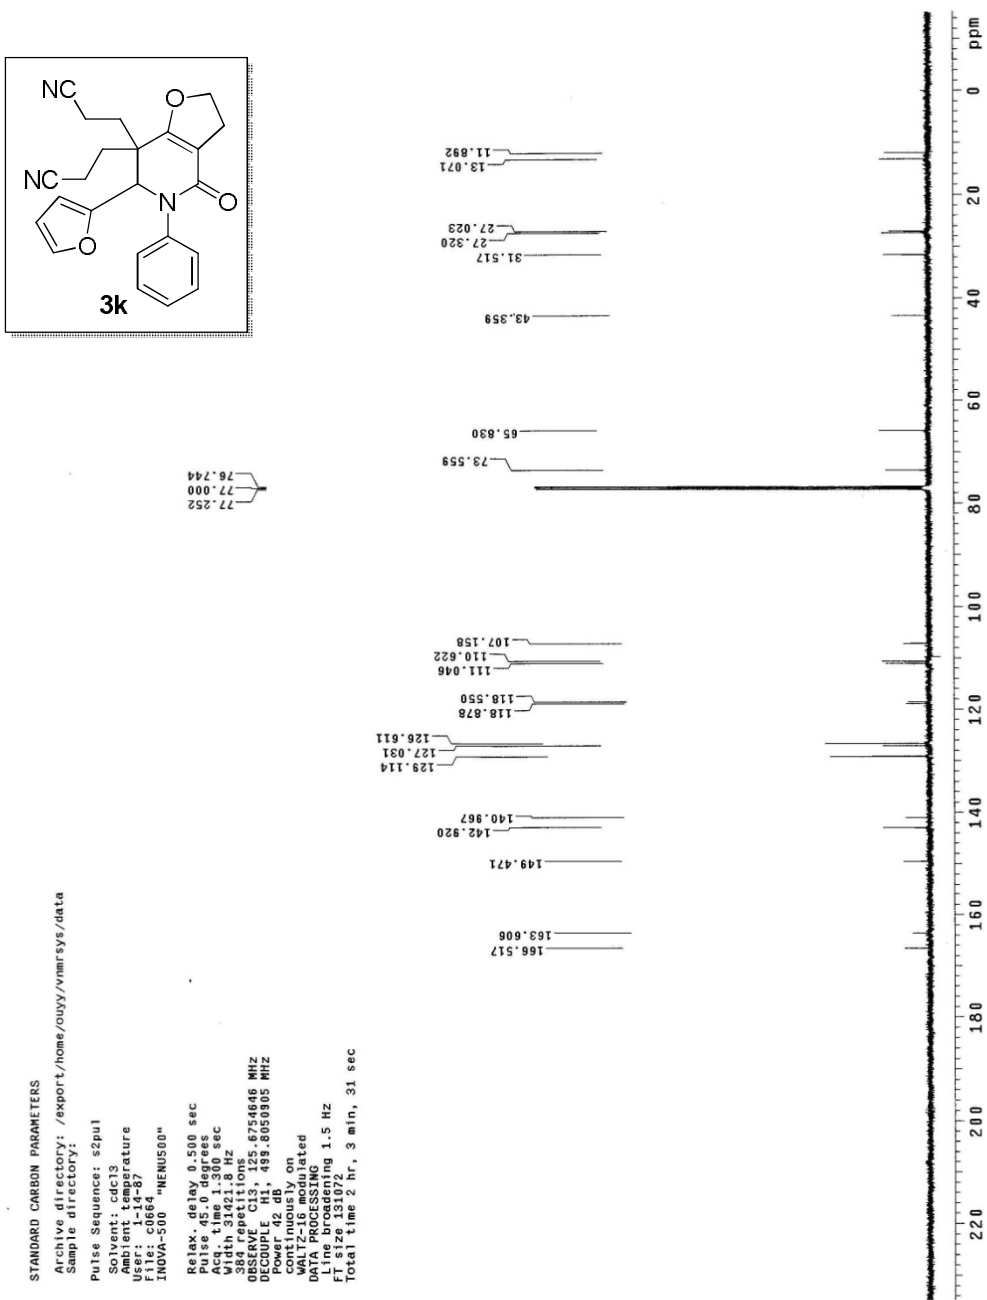





Supplementary Material (ESI) for Organic & Biomolecular Chemistry  
This journal is (c) The Royal Society of Chemistry 2012

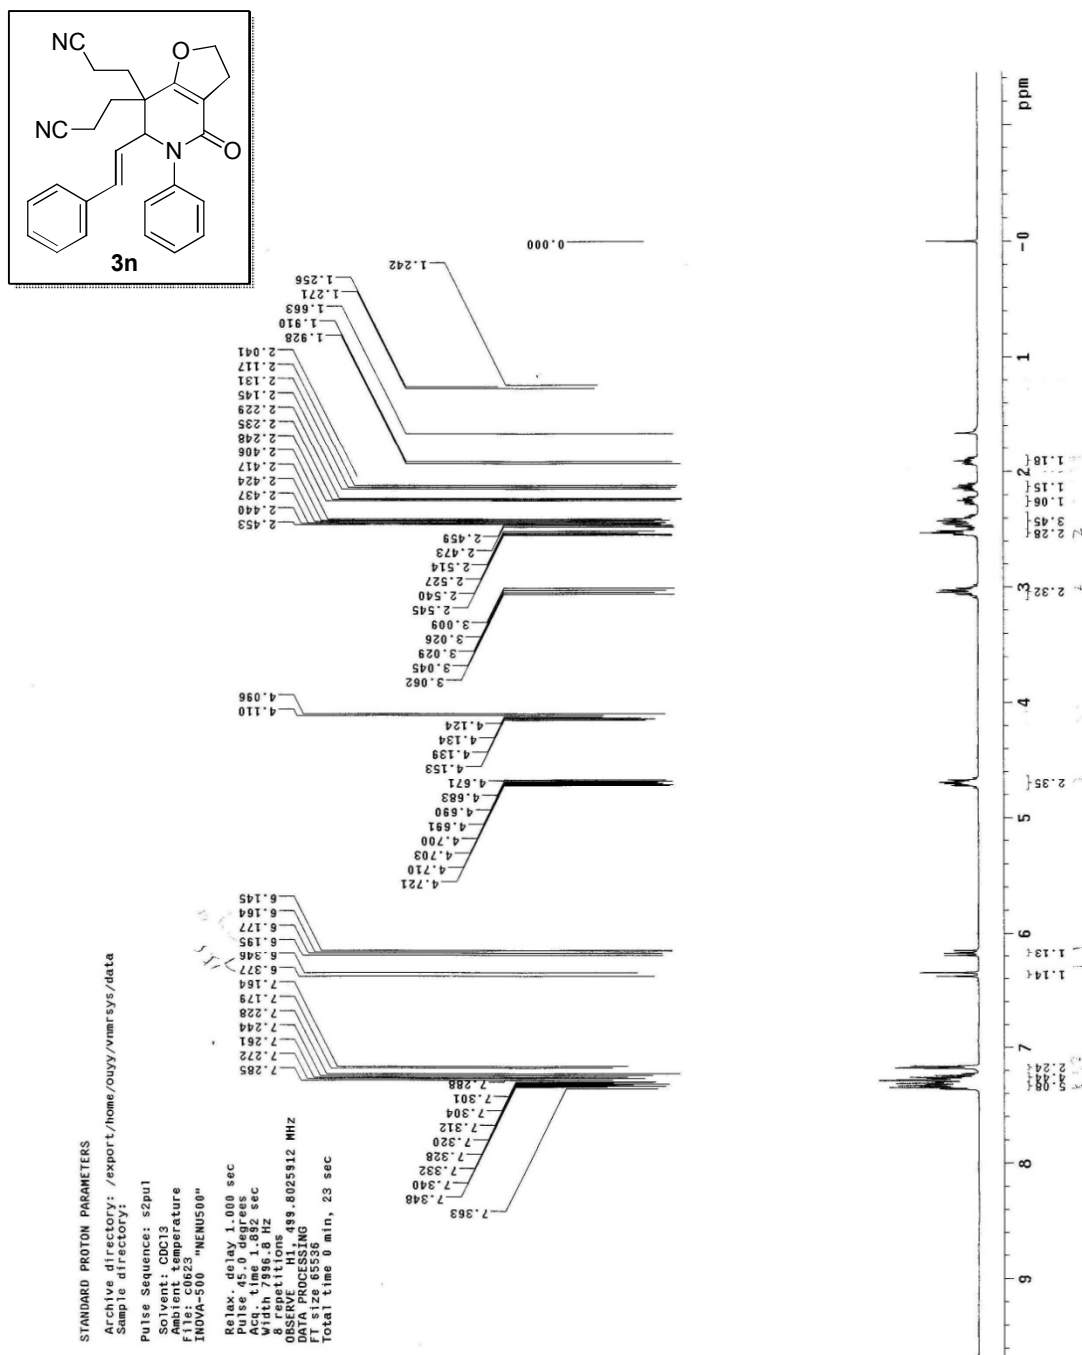



Supplementary Material (ESI) for Organic & Biomolecular Chemistry  
This journal is (c) The Royal Society of Chemistry 2012

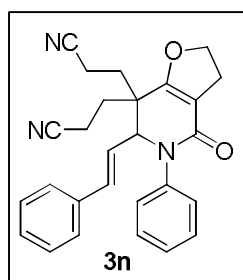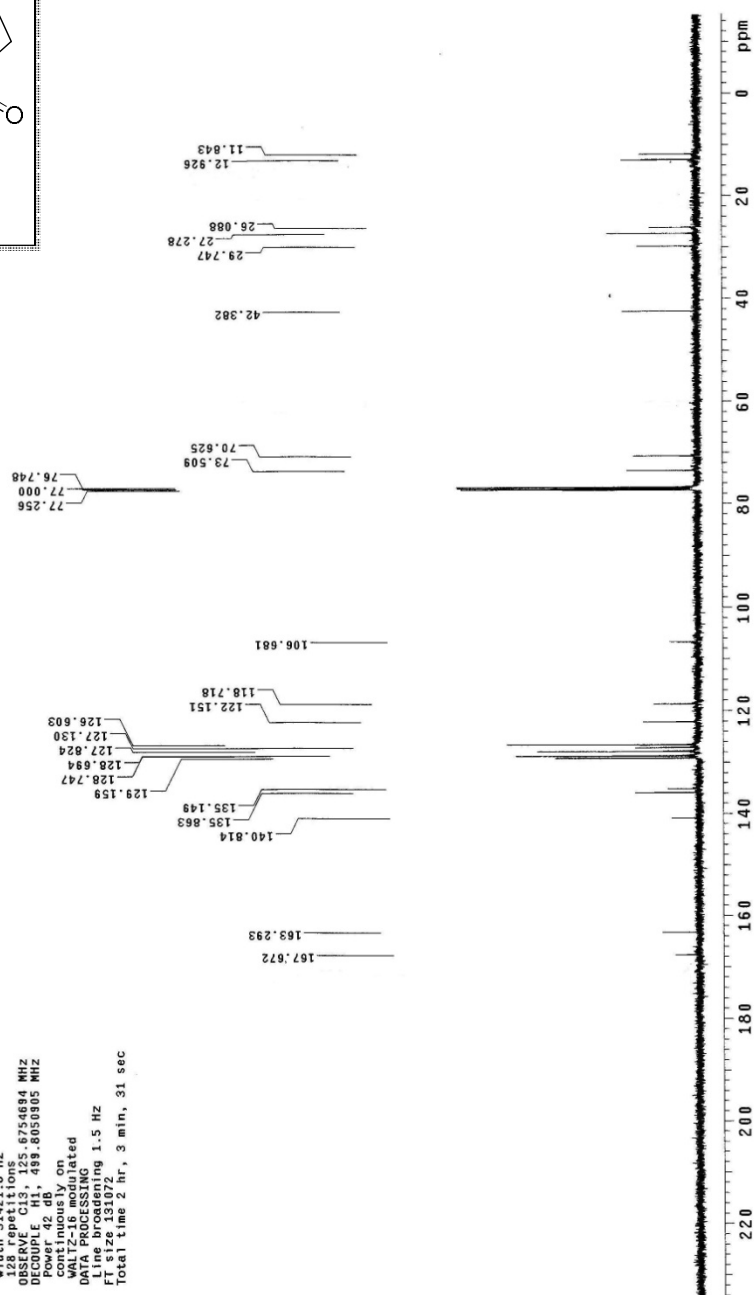

STANDARD CARBON PARAMETERS  
Archive directory: /export/home/ouy/vnmr/sys/data  
Sample directory:  
Pulse Sequence: szpul  
Solvent: cdcl3  
Ambient temperature  
Error: 1.4e-07  
File: c0633  
INOVA-500 "MENU500"  
Relax. delay 0.500 sec  
Pulse 45.0 degrees  
Acq. time 1.500 sec  
Width 3141.8 Hz  
128 repetitions  
OBSERVE C13, 125.6754694 MHz  
DECOUPLE H1, 499.8056905 MHz  
P2 62 dB, continuously on  
WALTZ-16 modulated  
DATA PROCESSING  
F2 125.6754694 MHz  
FT size 131072  
Total time 2 hr, 3 min, 31 sec

Supplementary Material (ESI) for Organic & Biomolecular Chemistry  
This journal is (c) The Royal Society of Chemistry 2012

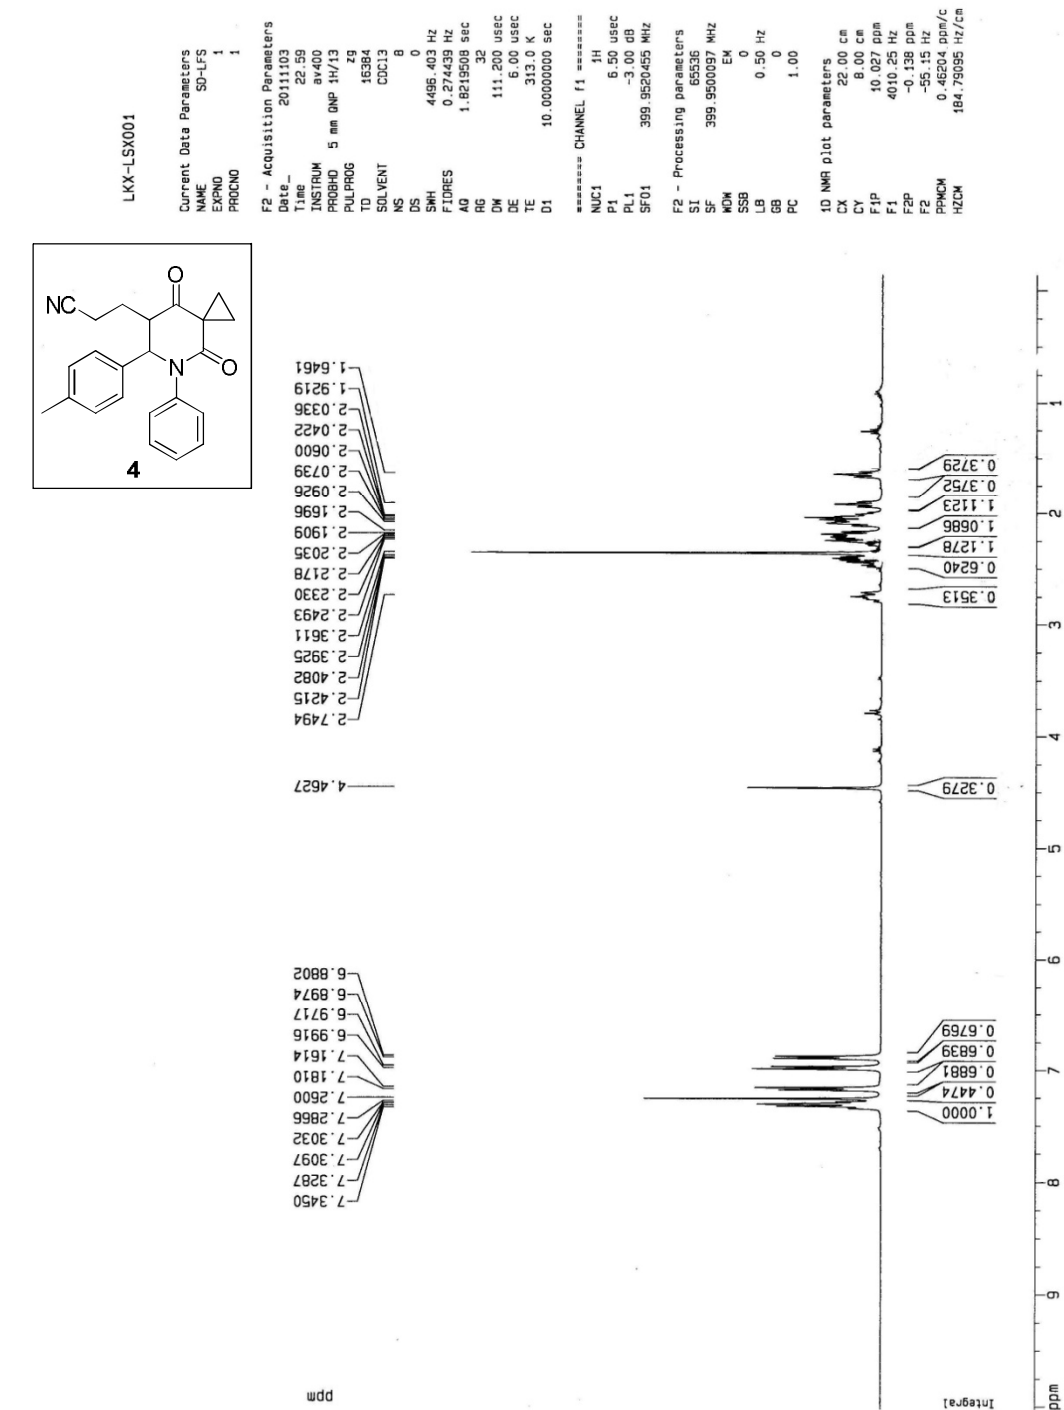

Supplement: c2ob25550b.pdf [file c2ob25550b.pdf]
